# Supplementary material
Source: PubMed Central journal article supplement (PMC7166195)

**A**

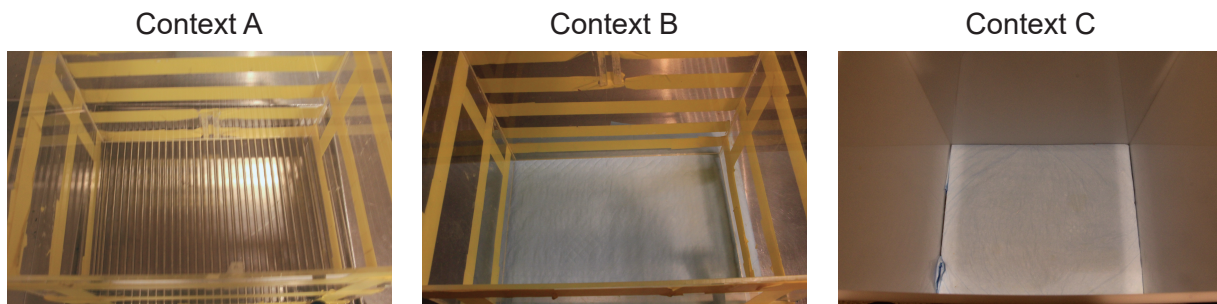

**B**

|                     | Context A                   | Context B                   | Context C             |
|---------------------|-----------------------------|-----------------------------|-----------------------|
| Chamber (L × W × H) | 24 cm × 19 cm × 17.5 cm     | 24 cm × 19 cm × 17.5 cm     | 32 cm × 25 cm × 32 cm |
| Floor               | Steel grid                  | Soft pad                    | Soft pad              |
| Wall                | Transparent (w/ visual cue) | Transparent (w/ visual cue) | Opaque and white      |
| Odor                | Acetic acid (1%)            | Acetic acid (1%)            | Benzaldehyde (0.25%)  |
| Lighting            | Ambient light               | Ambient light               | Ambient light + lamp  |

**C**

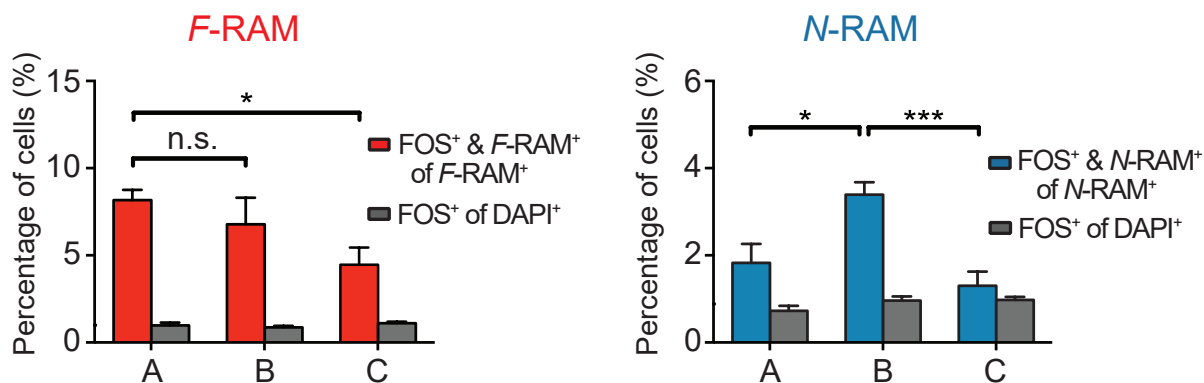

Supplement: NIHMS1575980-supplement-3.pdf [file NIHMS1575980-supplement-3.pdf]
