# Supplementary material
Source: PubMed Central journal article supplement (PMC7166195)

**A** Induced FOS expression (FOS<sub>ind</sub>)  
mIPSC

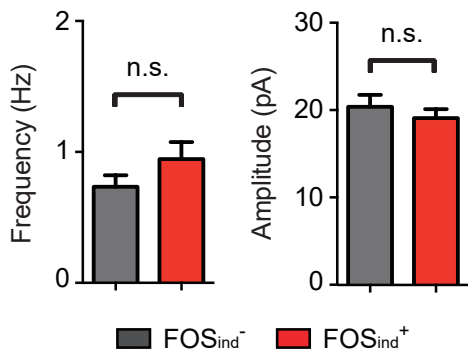

**B** Induced NPAS4 expression (NPAS4<sub>ind</sub>)  
mEPSC

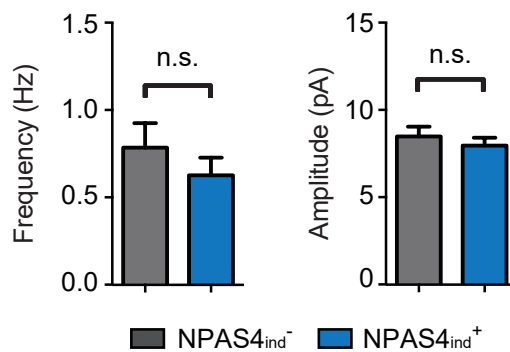

**C** F-RAM

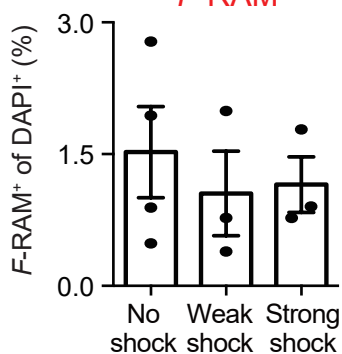

**D** N-RAM

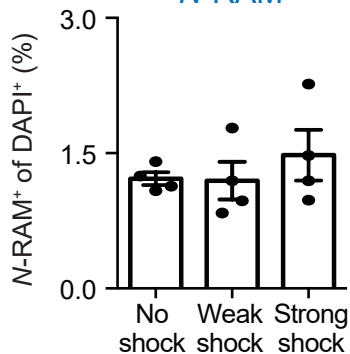

Supplement: NIHMS1575980-supplement-6.pdf [file NIHMS1575980-supplement-6.pdf]
