# Supplementary material
Source: PubMed Central journal article supplement (PMC7166195)

Figure S1

A

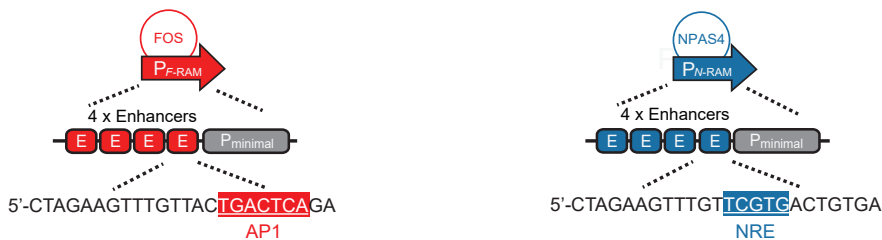

B

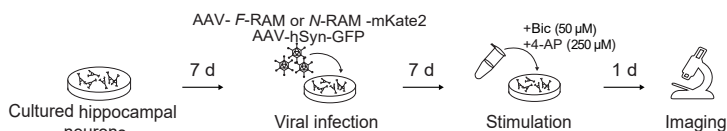

C

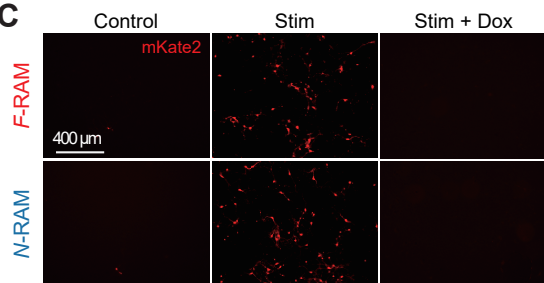

D

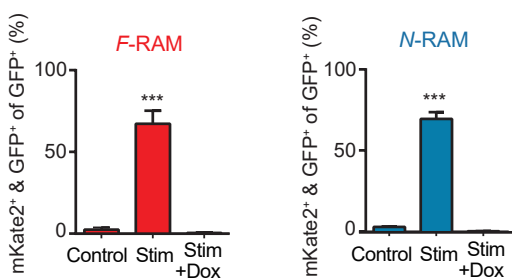

E

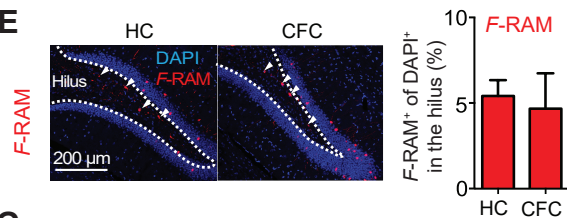

F

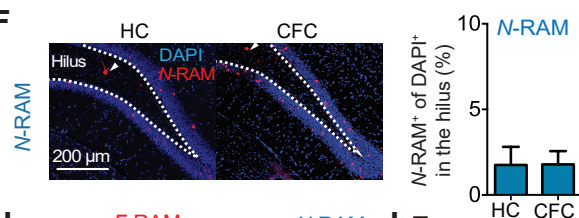

G

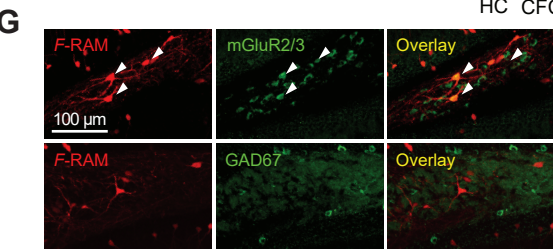

H

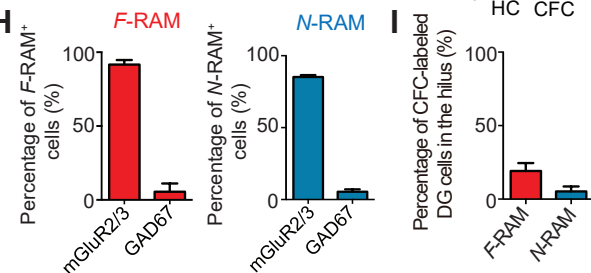

I

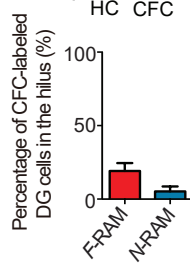

J

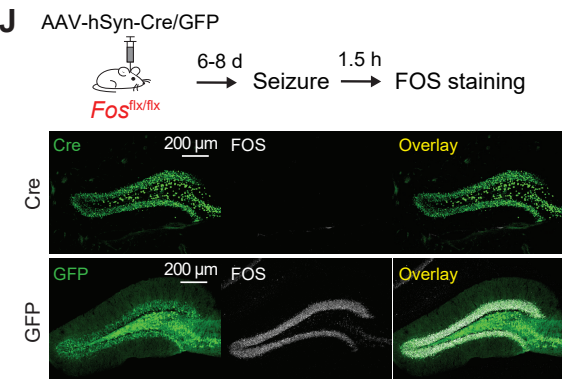

K

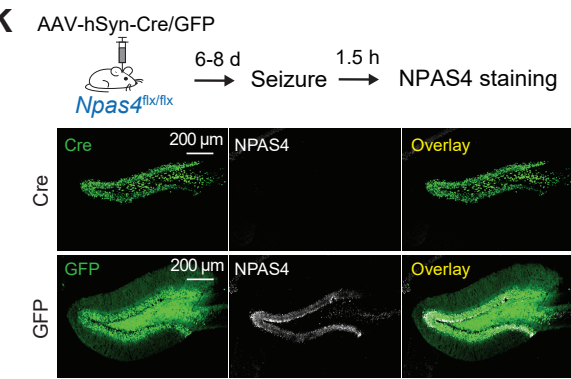

Supplement: NIHMS1575980-supplement-1.pdf [file NIHMS1575980-supplement-1.pdf]

Figure S2

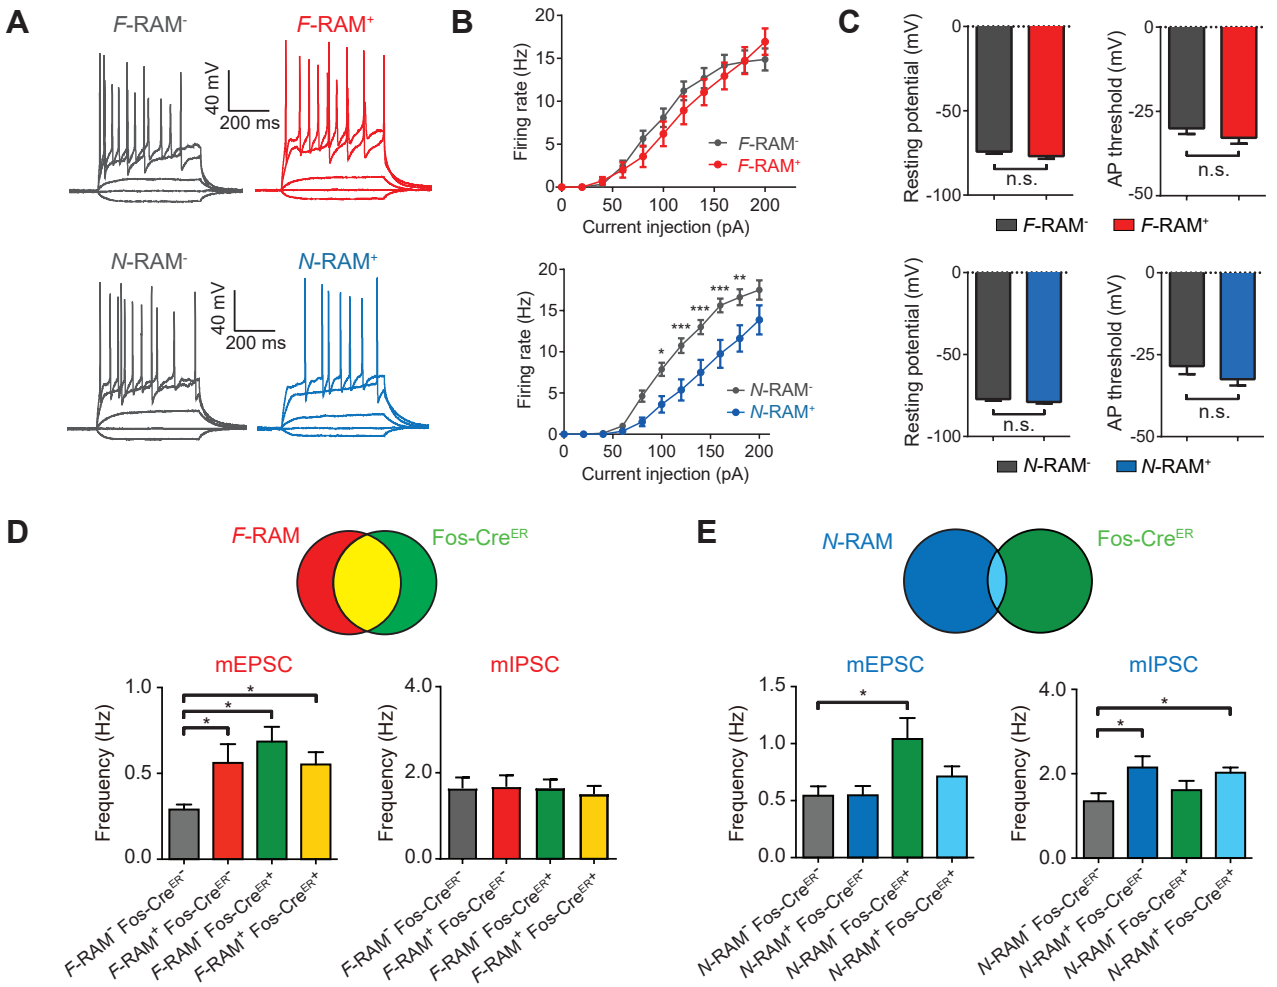

Supplement: NIHMS1575980-supplement-2.pdf [file NIHMS1575980-supplement-2.pdf]

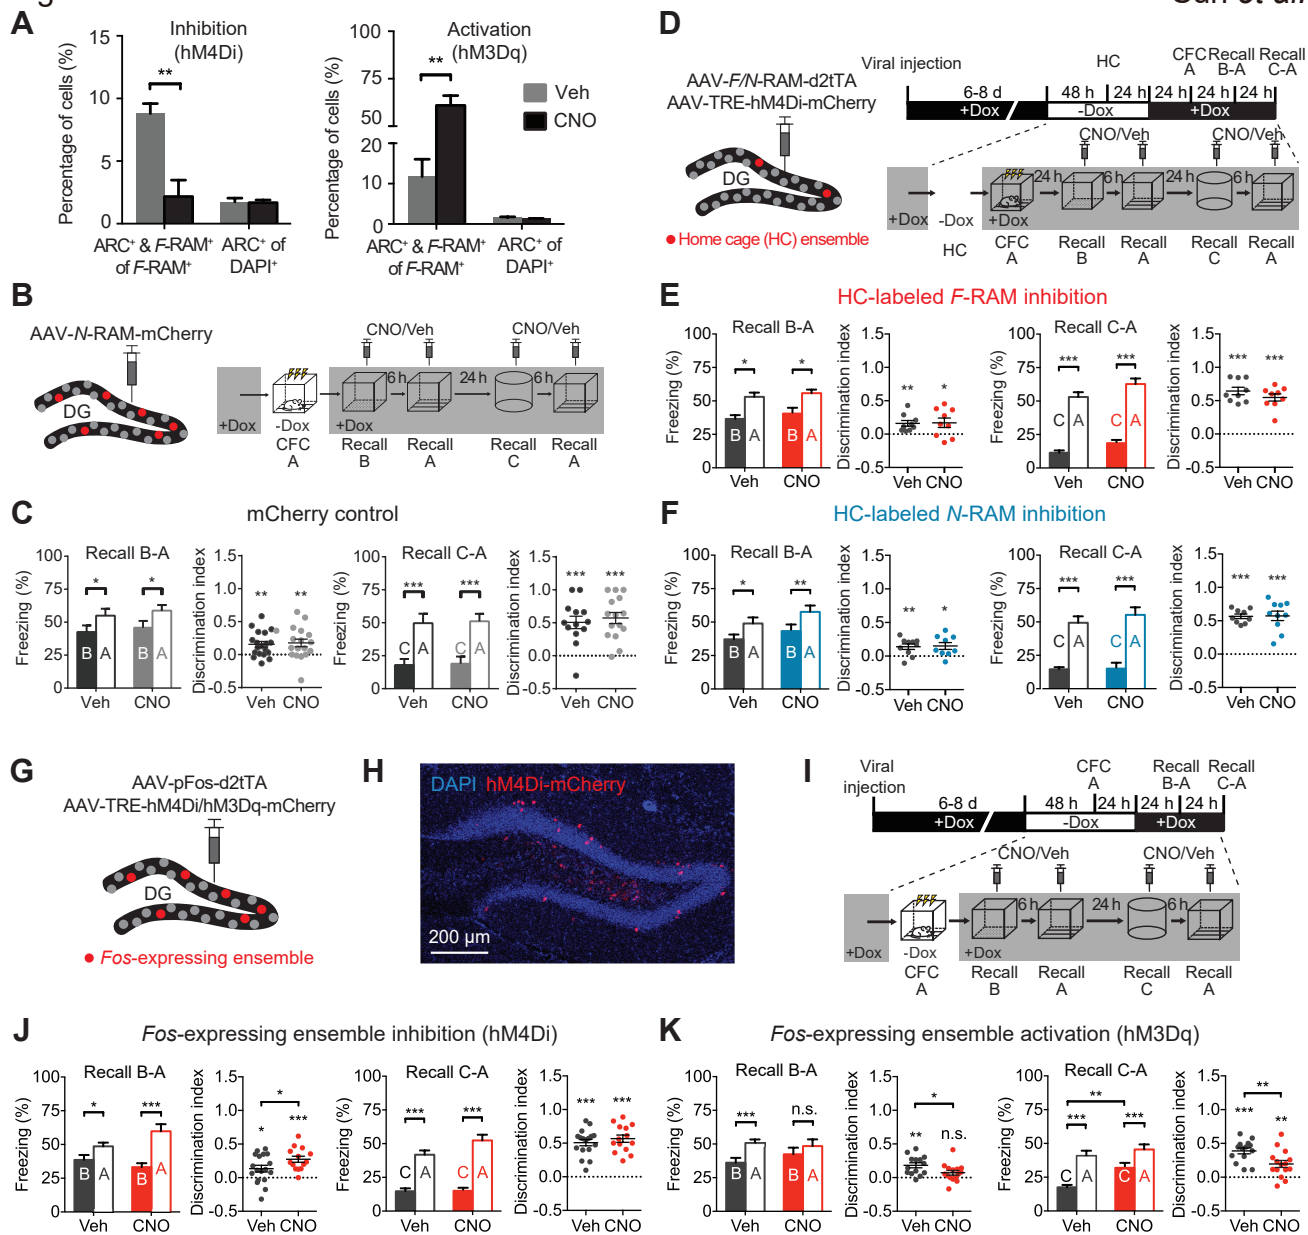

Supplement: NIHMS1575980-supplement-4.pdf [file NIHMS1575980-supplement-4.pdf]

Figure S5

Sun et al.

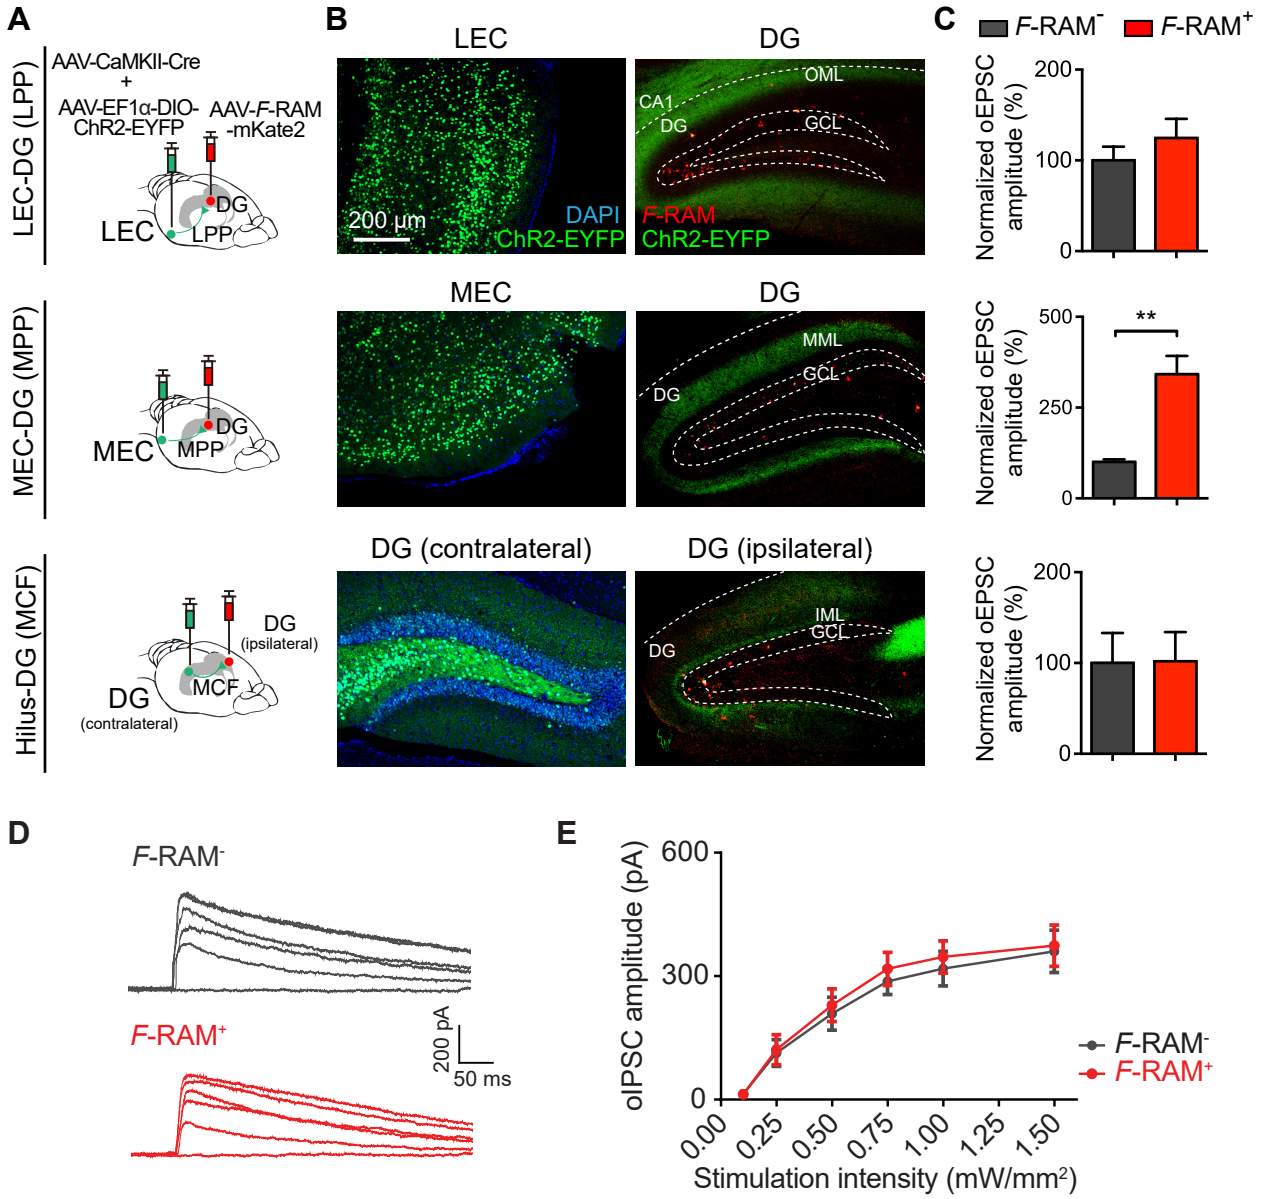

Supplement: NIHMS1575980-supplement-5.pdf [file NIHMS1575980-supplement-5.pdf]

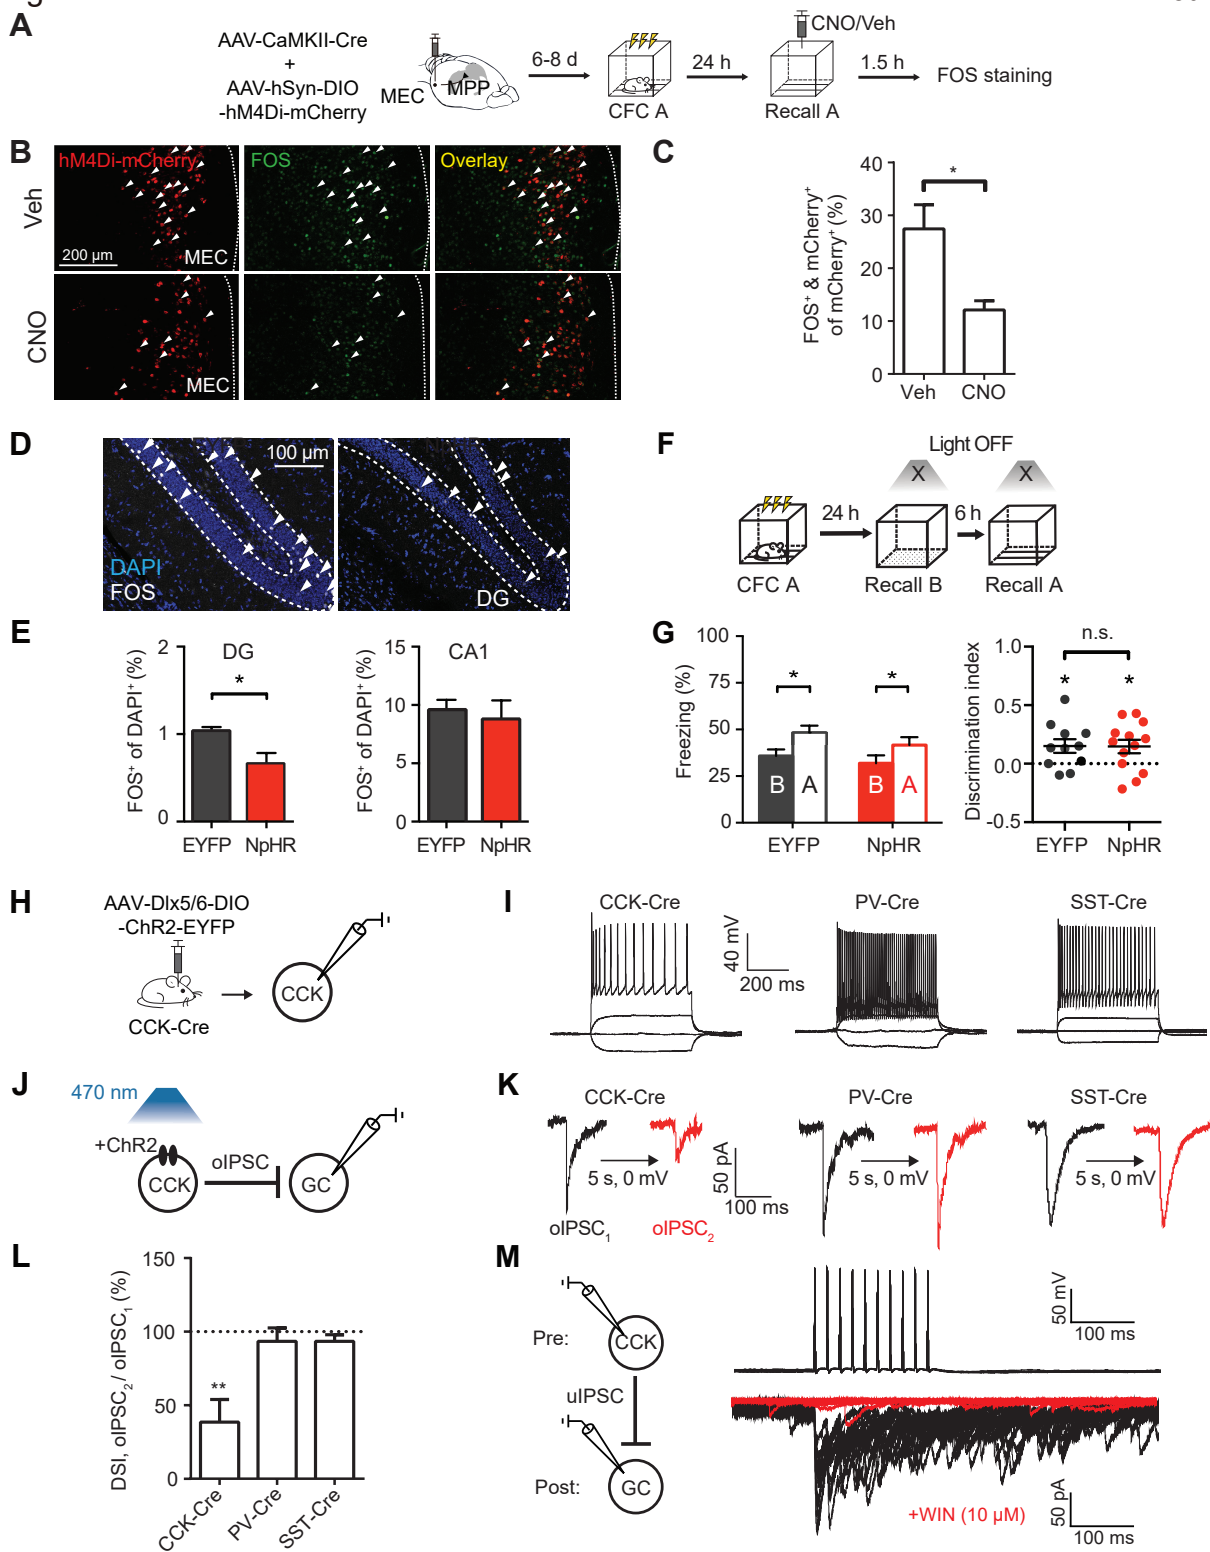

Supplement: NIHMS1575980-supplement-7.pdf [file NIHMS1575980-supplement-7.pdf]
